# Supplementary material for: Implementation and Evaluation of A New Model of Online, Facilitated, Peer Group Supervision for Dietitians Working in Eating Disorders: A Descriptive Overview Informed by The Kirkpatrick Training Evaluation Framework
Source: Research Square preprint supplement (doi:10.21203/rs.3.rs-1319215/v1), 2022-02-07
Supplement: Supplementary file 3 [file b56208b4dddf2f4c285e1895.pdf]

## ADDITIONAL FILE: SESSION FORMAT WITH SCRIPT

| SESSION<br>FORMAT             | DESCRIPTION                                                                                                                                                                                              | SCRIPT                                                                                                                                                                                                                           | TIMING   |
|-------------------------------|----------------------------------------------------------------------------------------------------------------------------------------------------------------------------------------------------------|----------------------------------------------------------------------------------------------------------------------------------------------------------------------------------------------------------------------------------|----------|
| WELCOME                       |                                                                                                                                                                                                          |                                                                                                                                                                                                                                  | 0-30min  |
| <b>Individual welcomes</b>    | An opportunity to make participants feel welcome, document attendance, encourage informal information sharing, foster a safe environment, and gather information to set agenda for the upcoming session. | Welcome each participant individually.<br>“How has your last month been in EDs?”<br>“Any 30 second rants?”<br>“Any 30 second raves?”<br>“Any self-care tips?”<br>“Any cases/situations you would like to add to today’s agenda?” |          |
| <b>Agenda setting</b>         | Agenda is designed to meet group needs e.g., urgent requests for case discussion, choice of case/situation that is most pertinent to learning needs of the group.                                        | “(Participant’s name) has an interesting case/situation to raise for group discussion. Are we all happy for this to be our main discussion today?”                                                                               |          |
| CASE/SITUATION FOR DISCUSSION |                                                                                                                                                                                                          |                                                                                                                                                                                                                                  | 30-60min |
| <b>Case presentation</b>      | Facilitator guides the presenter through detailing a summary of the case plus what feedback they would like from the group. Facilitator ensures timekeeping and avoidance of advice-giving.              | “Please outline the key details of this case and what you would like from the group.”<br>Facilitator re-iterates the case plus request to the group.                                                                             |          |

|                                                         |                                                                                                                                             |                                                                                                                                                                                                                                                                               |                 |
|---------------------------------------------------------|---------------------------------------------------------------------------------------------------------------------------------------------|-------------------------------------------------------------------------------------------------------------------------------------------------------------------------------------------------------------------------------------------------------------------------------|-----------------|
| <b>Clarifying questions</b>                             | All participants are asked in turn if they need further information on the case, before they are individually asked to comment on the case. | “Have you any clarifying questions prior to providing comment on the case?”                                                                                                                                                                                                   |                 |
| <b>Comments/shared experience</b>                       | Each participant is asked to comment individually without providing direct advice                                                           | “Have you experience to share or any comments on this case?”                                                                                                                                                                                                                  |                 |
| <b>Learnings</b>                                        | Case presenter details what they have gleaned from the discussion.                                                                          | “Now that you have heard the experiences/comments from the group could you please share your learnings from this?”                                                                                                                                                            |                 |
| <b>FOCUS TOPIC</b>                                      |                                                                                                                                             |                                                                                                                                                                                                                                                                               | <b>60-85min</b> |
| <b>Pre-recorded presentation</b><br><br><b>Feedback</b> | A pre-recorded power point didactic presentation is shared with the group, who are invited to comment post presentation                     | “Has anyone any comments on the focus presentation for the group?”                                                                                                                                                                                                            |                 |
| <b>ENDING WELL</b>                                      |                                                                                                                                             |                                                                                                                                                                                                                                                                               | <b>85-90min</b> |
| <b>Feedback</b><br><b>Ongoing support</b>               | Participants are invited to provide feedback on the session and are reminded that support is available from facilitator between groups      | “Thanks so much to you all for your contributions today.”<br>“Does anyone have feedback on today’s session?”<br>“Please do not hesitate to contact myself or the co-facilitator is there is anything you do not feel comfortable to share in session, or any urgent matters.” |                 |
