# Supplementary material for: Implementation and Evaluation of A New Model of Online, Facilitated, Peer Group Supervision for Dietitians Working in Eating Disorders: A Descriptive Overview Informed by The Kirkpatrick Training Evaluation Framework
Source: Research Square preprint supplement (doi:10.21203/rs.3.rs-1319215/v1), 2022-02-07
Supplement: Supplementary file 4 [file ba3e952d1f41024c45dd24b0.pdf]

## FOLLOW-UP (6month) SURVEY

1. Please enter the code for your F-PGS group.
2. How would you describe the geographical location of your dietetic practice?
3. In what area are you currently employed?
4. How many years of clinical dietetic experience do you have?
5. What age range of eating disorder patients do you manage?
6. In what settings do you treat eating disordered clients?
7. How many clients with eating disorders did you provide dietetic care for in the past 12months?
8. Do you currently receive clinical/professional supervision/mentoring in the field of eating disorders in addition to attending QuEDS F-PGS?
9. Have you received ED-specific supervision in the past?
10. Do you feel that ED-specific clinical dietetic supervision is readily available?
11. Do you currently provide clinical/professional supervision to dietitians?
12. Please indicate your agreement with the following statements (Likert scale)
  - a. I feel confident applying evidence-based practice in the treatment of EDs
  - b. I feel confident engaging/communicating with people with EDs
  - c. I feel supported as a dietitian working in the field of EDs
13. How would you prefer to be supported to improve your skill in dietetic intervention for clients with eating disorders? (ranking)
  - a. Individual clinical supervision
  - b. Facilitated peer group support (F-PGS)
  - c. Education sessions delivered by a specialist
  - d. Online education modules
  - e. Clearly documented guidelines/nutrition pathways
  - f. Seminars/workshops
  - g. Peer group supervision
14. Please indicate if you agree or disagree with the following statements as a member of a QuEDS F-PGS group
  - a. The group is too structured
  - b. Members feel safe enough to expose their practice in the group setting
  - c. Members are giving advice and other less than helpful responses
  - d. Members feel equal to other members in the group
  - e. There is sufficient time to meet the supervision needs of the group
  - f. Some individuals are dominating, and others have become passive
  - g. Personalities or group dynamics are impacting on the quality of the supervision

- h. Confidentiality of issues discussed is being maintained
- i. Members feel criticised or demoralised
- j. Members feel supported by the group
- k. Members feel the group impacts positively on feelings of confidence
- l. Facilitation of PGS impacts positively on group process

15. Now you have completed 6months of F-PGS do you have any feedback/comments to help us improve this model of professional support?
