# Supplementary material for: Implementation and Evaluation of A New Model of Online, Facilitated, Peer Group Supervision for Dietitians Working in Eating Disorders: A Descriptive Overview Informed by The Kirkpatrick Training Evaluation Framework
Source: Research Square preprint supplement (doi:10.21203/rs.3.rs-1319215/v1), 2022-02-07
Supplement: Supplementary file 6 [file f9c1ae587c191e5246169c57.pdf]

## BASELINE SURVEY (pre-commencement)

1. Please enter the code for your F-PGS group
2. How would you describe the geographical location of your dietetic practice?
  - a. Capital city
  - b. Metropolitan centre (pop >100,000)
  - c. Rural centre (10,000-99,000)
  - d. Remote centre (5,000-9,999)
  - e. Remote area (<5,000)
3. In what area are you currently employed?
  - a. Public hospital service
  - b. Public community health service
  - c. Private hospital
  - d. Private practice
  - e. University clinic
  - f. Public ED specialist service
  - g. Non-government organisation
  - h. Dietetic student
4. How many years of clinical dietetic experience do you have?
  - a. <5years
  - b. 5-10years
  - c. >10years
5. What age range of eating disorder patients do you manage?
  - a. Paediatric
  - b. Adolescent
  - c. Adult
6. In what settings do you treat eating disordered clients?
  - a. Paediatric medical wards
  - b. Adolescent medical wards
  - c. Adult medical wards
  - d. Adolescent mental health wards
  - e. Adult mental health wards
  - f. Medical outpatient clinics
  - g. Mental health outpatient clinics
  - h. Community mental health clinics
  - i. Private practice clinics
  - j. University clinics

- k. Non-government organisations
7. How many clients with eating disorders did you provide dietetic care for in the past 12 months?
    - a. <5 patients
    - b. 5-15 patients
    - c. >15 patients
  8. Do you currently receive clinical/professional supervision/mentoring in the field of eating disorders?
  9. Have you received ED-specific supervision in the past?
  10. Do you feel that ED-specific clinical dietetic supervision is readily available?
  11. Do you currently provide clinical/professional supervision to dietitians?
  12. Please indicate whether you agree with the following statements (Likert scale)
    - a. I feel confident applying evidence-based practice in the treatment of EDs
    - b. I feel confident engaging/communicating with people with EDs
    - c. I feel supported as a dietitian working in the field of EDs
  13. How would you prefer to be supported to improve your skill in dietetic intervention for clients with eating disorders? Ranking scale.
    - a. Facilitated peer group supervision (F-PGS)
    - b. Individual clinical supervision
    - c. Education sessions delivered by an ED specialist
    - d. Online education modules
    - e. Clearly documented guidelines/nutrition pathways
    - f. Seminars/workshops
    - g. Peer group supervision
  14. Do you have any comments to make before we begin the Facilitated Peer Group Support Sessions?
